# Supplementary material for: Safety, immunogenicity and efficacy of an mRNA-based COVID-19 vaccine, GLB-COV2-043, in preclinical animal models
Source: PubMed Central journal article supplement (PMC10692331; doi:10.1038/s41598-023-46233-6), 2023-12-01
Supplement: 41598_2023_46233_MOESM1_ESM.pdf [file 41598_2023_46233_MOESM1_ESM.pdf]

**Figure S1**

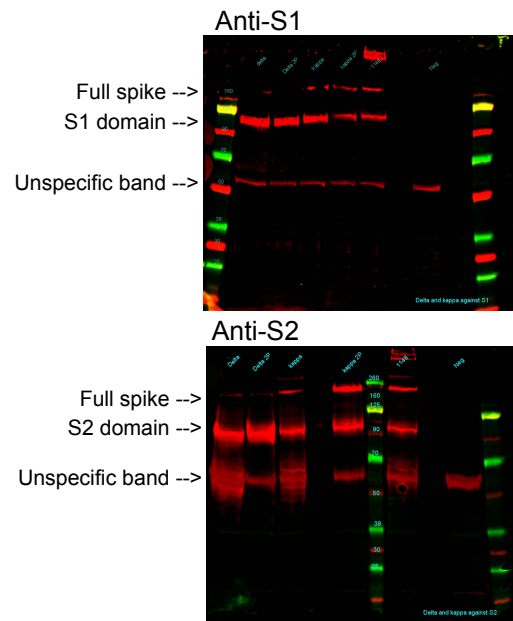

**Figure S1:** Raw images of Figure 1B. HEK293FT cells were transfected with mRNA expressing SARS-CoV-2 spike from indicated SARS-CoV-2 strains and evaluated by western blot 24 hours post-transfection using anti-RBD (upper panel) or anti-S2 domain antibodies (lower panel). Mock-transfected (PBS) cells served as a negative control. 2P = spike containing two stabilizing proline substitutions; 1148 = Wild-type (non-stabilized) SARS-CoV-2 Wuhan spike; Full spike, full length spike.
